# Supplementary material for: Magnetic Bead-Based Electrochemical Immunoassays On-Drop and On-Chip for Procalcitonin Determination: Disposable Tools for Clinical Sepsis Diagnosis
Source: MDPI journal article supplement (doi:10.3390/bios10060066), 2020-06-17
Supplement: s1 [file s1]

# Magnetic Bead-Based Electrochemical Immunoassays On-Drop and On-Chip for Procalcitonin Determination: Disposable Tools for Clinical Sepsis Diagnosis

Águeda Molinero-Fernández <sup>1,†</sup>, María Moreno-Guzmán <sup>2,†</sup>, Miguel Ángel López <sup>1,3,\*</sup> and Alberto Escarpa <sup>1,3,\*</sup>

<sup>1</sup> Department of Analytical Chemistry, Physical Chemistry and Chemical Engineering, Universidad de Alcalá, Ctra. Madrid-Barcelona, Km. 33.600, 28871 Alcalá de Henares, Madrid, Spain; agueda.molinero@edu.uah.es

<sup>2</sup> Department of Chemistry in Pharmaceutical Sciences, Analytical Chemistry, Faculty of Pharmacy, Universidad Complutense de Madrid, Avenida Complutense, s/n, 28040 Madrid, Spain; marimore@ucm.es

<sup>3</sup> Chemical Research Institute "Andres M. Del Rio", Universidad de Alcalá, 28871 Alcalá de Henares, Madrid, Spain

\* Correspondence: miguelan.lopez@uah.es (M.Á.L); alberto.escarpa@uah.es (A.E)

† Both authors contributed equally to this work.

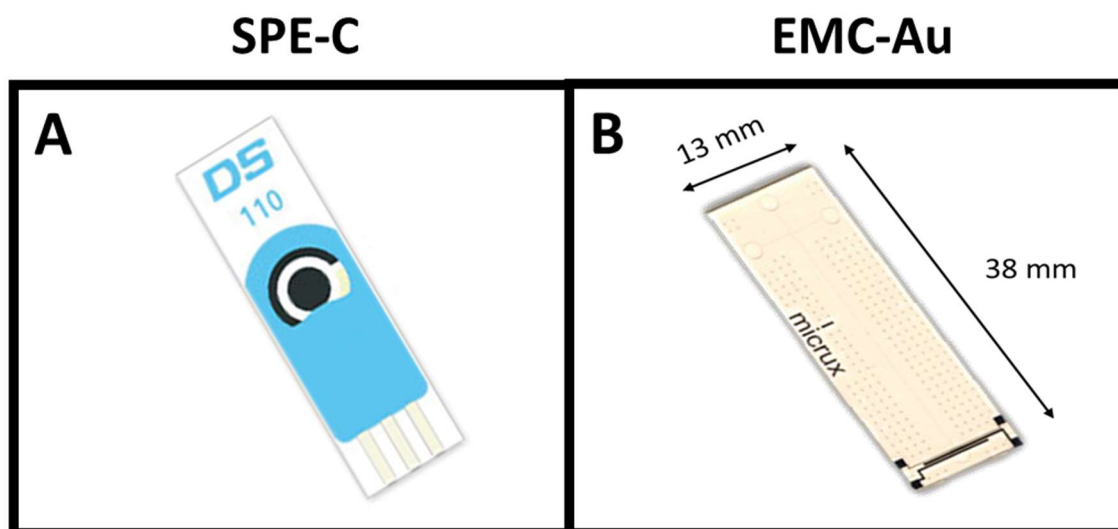

**Figure S1.** Electrochemical devices for immunoassay electrochemical detection: A) disposable SPE-C for *on-drop* approach and B) EMC-Au for *on-chip* approach.

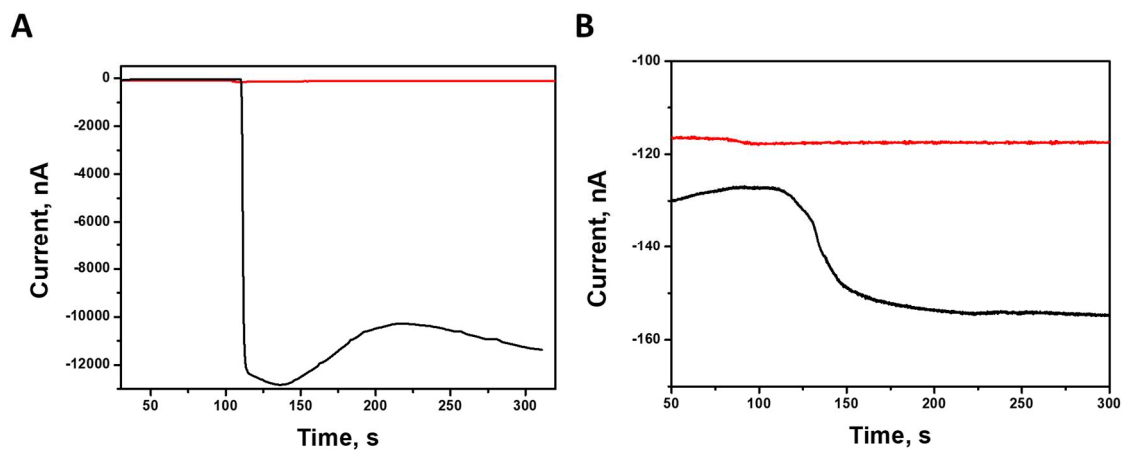

**Figure S2.** Amperometric detection of the mediated reduction of  $\text{H}_2\text{O}_2$  with HQ using *on-drop* (A) and *on-chip* (B) approaches in the **absence** and **presence** of PCT; [PCT] =  $100 \text{ ng mL}^{-1}$  (A),  $0.5 \text{ ng mL}^{-1}$  (B).

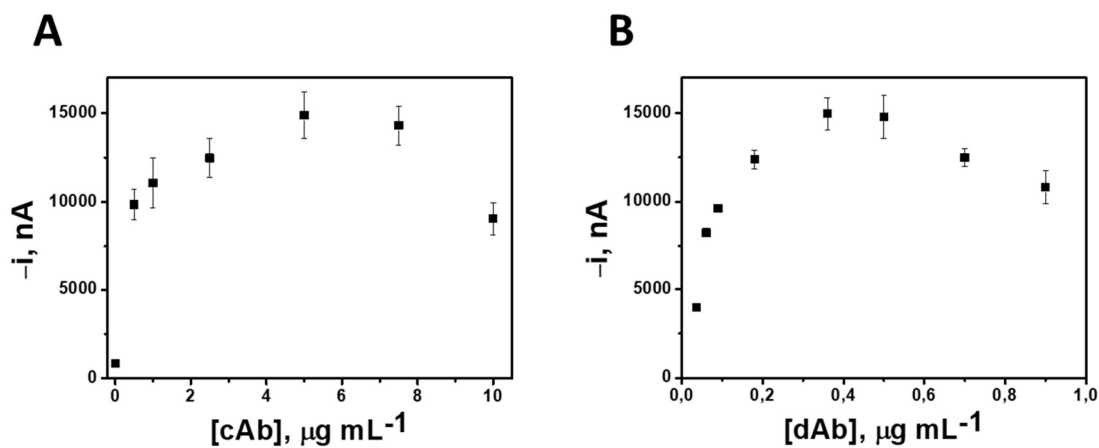

**Figure S3.** Current signals obtained for different concentrations of capture antibody (cAb) (A) and detection antibody (dAb) (B) using the *on-drop* SPE-C approach. Conditions: incubation time = 60 minutes each stage; PCT concentration  $1000 \text{ ng mL}^{-1}$ .

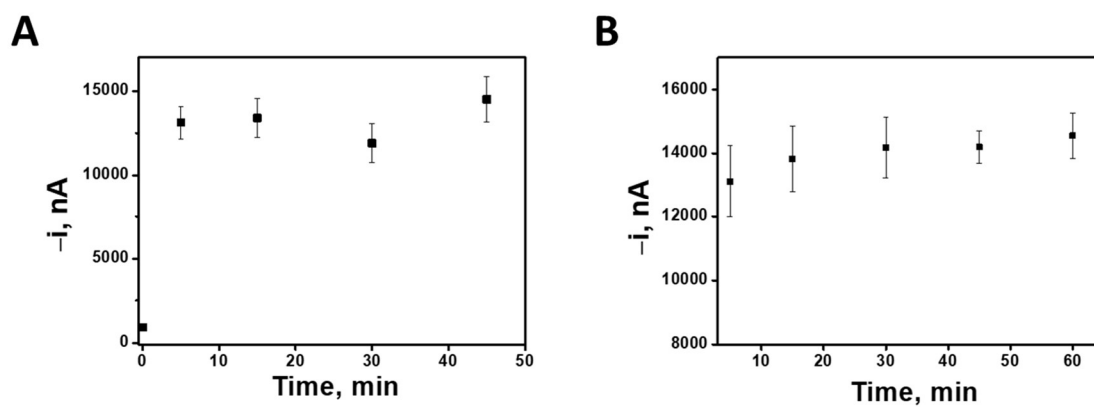

**Figure S4.** Current signals obtained for different incubation times in the immobilization of capture antibody (cAb) (A) and binding of detection antibody (dAb) (B) using the *on-drop* SPE-C approach. Conditions: cAb = 5  $\mu\text{g mL}^{-1}$ ; dAb = 0.36  $\mu\text{g mL}^{-1}$ ; PCT concentration 1000  $\text{ng mL}^{-1}$ .
